# Supplementary material for: The Effect of Low Doses of Zearalenone (ZEN) on the Bone Marrow Microenvironment and Haematological Parameters of Blood Plasma in Pre-Pubertal Gilts
Source: MDPI journal article supplement (doi:10.3390/toxins14020105), 2022-01-29
Supplement: s1 [file s1]

Supplementary Materials

# The Effect of Low Doses of Zearalenone (ZEN) on the Bone Marrow Microenvironment and Haematological Parameters of Blood Plasma in Pre-Pubertal Gilts

Magdalena Mróz, Magdalena Gajęcka, Katarzyna E. Przybyłowicz, Tomasz Sawicki, Sylwia Lisieska-Żołnierczyk Łukasz Zielonk and Maciej Tadeusz Gajęcki

**Table S1.** Selected haematological parameters in group C on different analytical dates ( $\bar{x}$ , SD).

| Blood collection dates | WBC 10 <sup>9</sup> /L      | NEUT %                     | LYMPH %                     | RBC 10 <sup>12</sup> /L        | HGB g/L                          | HCT %                           | MCHC g/dl                    | RDW %                      | HDW g/dl                 |
|------------------------|-----------------------------|----------------------------|-----------------------------|--------------------------------|----------------------------------|---------------------------------|------------------------------|----------------------------|--------------------------|
| 1                      | 23.74 ± 0.39 <sup>ddg</sup> | 45.06 ± 7.33               | 47 ± 6.71                   | 6.49 ± 0.67 <sup>efg</sup>     | 10.16 ± 0.54                     | 35.48 ± 2.45 <sup>eeffgg</sup>  | 28.72 ± 0.71 <sup>e</sup>    | 17.62 ± 1.46               | 1.61 ± 0.17 <sup>d</sup> |
|                        | 20.59 ± 5.13                | 43.15 ± 8.79               | 49.22 ± 8.72                | 6.45 ± 0.2 <sup>e</sup>        | 10.62 ± 0.47                     | 36.18 ± 1.41 <sup>ee</sup>      | 29.4 ± 0.58 <sup>ee</sup>    | 15.82 ± 0.72               | 1.61 ± 0.12              |
| 2                      | 19.53 ± 2.35                | 40.58 ± 4.5                | 48.98 ± 5.63                | 6.4 ± 0.72 <sup>eeffg</sup>    | 9.82 ± 0.98                      | 34.58 ± 3.46 <sup>eeffgg</sup>  | 28.4 ± 0.15                  | 17 ± 1.36                  | 1.57 ± 0.03 <sup>d</sup> |
|                        | 22.11 ± 3.92 <sup>dd</sup>  | 33.08 ± 8.56               | 58.74 ± 7.41                | 5.72 ± 0.32 <sup>deeffgg</sup> | 9.28 ± 0.8                       | 33.11 ± 3.39 <sup>deeffgg</sup> | 27.98 ± 0.51                 | 17.36 ± 1.28               | 1.61 ± 0.11              |
| 3                      | 24.32 ± 5.58 <sup>g</sup>   | 46.04 ± 15.83              | 47.4 ± 15.05                | 6.51 ± 0.32 <sup>efg</sup>     | 10.86 ± 0.54                     | 36.94 ± 1.03 <sup>ee</sup>      | 29.42 ± 1.06 <sup>c ee</sup> | 15.68 ± 1.09               | 1.58 ± 0.11 <sup>d</sup> |
|                        | 18.95 ± 3.24                | 36.44 ± 8.55               | 57.1 ± 8.63                 | 6.76 ± 0.21                    | 11.12 ± 0.98 <sup>c</sup>        | 38.36 ± 3.09 <sup>ee</sup>      | 28.94 ± 0.45 <sup>ee</sup>   | 15.4 ± 0.54 <sup>a</sup>   | 1.44 ± 0.05              |
| 4                      | 12.8 ± 2.76                 | 27.76 ± 4.46 <sup>c</sup>  | 66.38 ± 4.35 <sup>abc</sup> | 6.62 ± 0.64 <sup>e</sup>       | 11.16 ± 0.65 <sup>c</sup>        | 38.9 ± 2.43 <sup>e</sup>        | 28.66 ± 0.48                 | 15.26 ± 0.54 <sup>ac</sup> | 1.46 ± 0.06              |
|                        | 20 ± 3.99                   | 26.66 ± 4.97 <sup>ac</sup> | 65.22 ± 4.53 <sup>ac</sup>  | 7.65 ± 0.54                    | 12.12 ± 0.71 <sup>abbcc</sup>    | 44.3 ± 2.77                     | 27.4 ± 0.46                  | 15.42 ± 0.51 <sup>a</sup>  | 1.39 ± 0.03              |
| 5                      | 22.76 ± 4.00 <sup>d</sup>   | 35.24 ± 6.74               | 56.72 ± 7.87                | 7.56 ± 0.32                    | 12.18 ± 0.74 <sup>aa bb cc</sup> | 42.28 ± 1.68                    | 28.8 ± 0.82 <sup>e</sup>     | 15.22 ± 0.75 <sup>ac</sup> | 1.51 ± 0.04              |
|                        | 15.2 ± 2.04                 | 27.14 ± 5.43 <sup>ac</sup> | 64.94 ± 6.51 <sup>ac</sup>  | 7.56 ± 0.36                    | 12.28 ± 1.13 <sup>aabbcc</sup>   | 42.4 ± 3.65                     | 29 ± 0.34                    | 15.34 ± 0.66 <sup>a</sup>  | 1.56 ± 0.06              |
| 6                      |                             |                            |                             |                                |                                  |                                 |                              |                            |                          |
|                        |                             |                            |                             |                                |                                  |                                 |                              |                            |                          |
| 7                      |                             |                            |                             |                                |                                  |                                 |                              |                            |                          |
|                        |                             |                            |                             |                                |                                  |                                 |                              |                            |                          |
| 8                      |                             |                            |                             |                                |                                  |                                 |                              |                            |                          |
|                        |                             |                            |                             |                                |                                  |                                 |                              |                            |                          |
| 9                      |                             |                            |                             |                                |                                  |                                 |                              |                            |                          |
|                        |                             |                            |                             |                                |                                  |                                 |                              |                            |                          |
| 10                     |                             |                            |                             |                                |                                  |                                 |                              |                            |                          |
|                        |                             |                            |                             |                                |                                  |                                 |                              |                            |                          |

Key: C – control group; WBC - White Blood Cells; NEUT - Neutrophils; LYMPH - Lymphocytes; RBC - Red Blood Cells; HGB - Haemoglobin; HCT - Haematocrit; MCHC - Mean Corpuscular Haemoglobin Concentrations; RDW - Red Blood Cell Distribution Width; HDW - Haemoglobin Distribution Width. Statistical symbols: <sup>a</sup> – relative to date 1; <sup>b</sup> – relative to date 3; <sup>c</sup> – relative to date 5; <sup>d</sup> – relative to date 7; <sup>e</sup> – relative to date 8; <sup>f</sup> – relative to date 9; <sup>g</sup> – relative to date 10. Statistically significant differences: <sup>a, b, c, d, e, f</sup> and <sup>g</sup> at  $P \leq 0.05$ ; <sup>aa, bb, cc, dd, ee, ff</sup> and <sup>gg</sup> at  $P \leq 0.01$ .
